# Supplementary material for: High prevalence of cardiovascular risk factors and insulin resistance 6 years after hyperglycemia first detected in pregnancy in Cape Town, South Africa
Source: PubMed Central journal article supplement — BMJ Open Diabetes Res Care. 2019 Nov 27;7(1):e000740. doi: 10.1136/bmjdrc-2019-000740 (PMC6887495; doi:10.1136/bmjdrc-2019-000740), 2019-11-27
Supplement: bmjdrc-2019-000740supp001.pdf [file bmjdrc-2019-000740supp001.pdf]

Supplemental Table 1. Comparison of participants followed up 5-6 years later and the participants lost to follow-up

|                                                      |                                 | Lost to follow-up, N = 278 | Followed-up, N = 220 | P-value |
|------------------------------------------------------|---------------------------------|----------------------------|----------------------|---------|
| Age at booking, years                                | Median (IQR)                    | 31 (26-35)                 | 31 (27-35)           | 0.879   |
| Number of pregnancies                                | Median (IQR)                    | 3 (2-4)                    | 3 (2-4)              | 0.375   |
| Number of live births                                | Median (IQR)                    | 1 (1-2)                    | 1 (0-2)              | 0.339   |
| Gestational age at booking, weeks                    | Median (IQR)                    | 17 (13-22)                 | 15 (11-21)           | 0.004*  |
| HIV positive                                         | n (%)                           | 19 (6.9)                   | 12 (5.5)             | 0.545   |
| CD4 count, cells/dl                                  | Median (IQR)                    | 454 (406-545)              | 492.5 (364-774)      | 0.725   |
| BMI at booking, kg/m <sup>2</sup>                    | Median (IQR)                    | 32.7 (27.6-38.4)           | 34.6 (28.8-41.4)     | 0.041*  |
| Random blood glucose at HFDP diagnosis, mmol/l       | Median (IQR)                    | 12.7 (11.4-14.4)           | 12.7 (11.2-14.1)     | 0.963   |
| Fasting plasma glucose at GDM diagnosis, mmol/l      | Median (IQR)                    | 5.9 (5.3-6.9)              | 5.8 (5.1-6.5)        | 0.054   |
| 1-hour OGTT plasma glucose at HFDP diagnosis, mmol/l | Median (IQR)                    | 10.6 (9.4-12.2)            | 10.5 (9.2-11.5)      | 0.064   |
| 2-hour OGTT plasma glucose at HFDP diagnosis, mmol/l | Median (IQR)                    | 12 (11.2-12.8)             | 9 (8.2-10)           | 0.011*  |
| Type of HFDP*                                        | DIP, n (%)                      | 122 (43.9)                 | 70 (31.8)            | 0.008   |
|                                                      | GDM, n (%)                      | 156 (56.1)                 | 150 (67.7)           |         |
| Treated with metformin or other orals during HFDP    | n (%)                           | 99 (35.6)                  | 61 (28.4)            | 0.089   |
| Treated with insulin during HFDP                     | n (%)                           | 80 (28.8)                  | 52 (24.1)            | 0.241   |
| Treated with both orals and insulin during HFDP      | n (%)                           | 4 (1.4)                    | 3 (1.4)              | 0.93    |
| Number of hospital admissions during HFDP            | Median (IQR)                    | 2 (1-3)                    | 2 (1-3)              | 0.104   |
| HbA <sub>1c</sub> at booking, %                      | Median (IQR)                    | 6.4 (5.9-7.2)              | 6.5 (6-7.4)          | 0.327   |
| Type of birth delivery                               | Caesarian section, n (%)        | 144 (52.8)                 | 120 (56.3)           | 0.439   |
|                                                      | Virginal, n (%)                 | 129 (47.3)                 | 93 (43.7)            |         |
| Gestational age at delivery weeks                    | Median (IQR)                    | 38 (37-38)                 | 38 (37-39)           | 0.038   |
| Fetal outcome                                        | Stillborn or miscarriage, n (%) | 10 (3.6)                   | 6 (2.8)              | 0.598   |
| Fetal birthweight, grams                             | Median (IQR)                    | 3230 (2805-3620)           | 3292 (2925-3610)     | 0.207   |

\*HFDP classified post-hoc, using WHO 2013 criteria
