# Supplementary material for: High prevalence of cardiovascular risk factors and insulin resistance 6 years after hyperglycemia first detected in pregnancy in Cape Town, South Africa
Source: PubMed Central journal article supplement — BMJ Open Diabetes Res Care. 2019 Nov 27;7(1):e000740. doi: 10.1136/bmjdrc-2019-000740 (PMC6887495; doi:10.1136/bmjdrc-2019-000740), 2019-11-27
Supplement: bmjdrc-2019-000740supp002.pdf [file bmjdrc-2019-000740supp002.pdf]

Supplemental Table 3. CVD risk factors, insulin resistance and metabolic syndrome prevalence 5-6 years post HFDP and comparison between DIP and GDM groups

| Cardiometabolic risk factor                                                         | Overall,<br>N = 220 |                        | DIP**, N = 70 | GDM***,<br>N = 150 | p-value |
|-------------------------------------------------------------------------------------|---------------------|------------------------|---------------|--------------------|---------|
|                                                                                     | n (%)               | 95%CI of<br>prevalence | n (%)         | n (%)              |         |
| <b>Metabolic syndrome</b>                                                           | 134<br>(60.9)       | 54.3-67.2              | 52 (74.3)     | 82 (54.7)          | 0.010   |
| <b>Obese</b> (30≤BMI<40kg/m <sup>2</sup> )                                          | 104<br>(47.3)       | 40.7-53.9              | 33 (46.5)     | 71 (47.7)          | 0.879   |
| <b>Morbidly obese</b> (BMI≥40kg/m <sup>2</sup> )                                    | 48 (21.8)           | 16.8-27.8              | 12 (17.1)     | 36 (24.2)          | 0.458   |
| <b>Central obesity</b><br>Waist circumference≥88cm                                  | 197<br>(90.4)       | 85.6-93.7              | 62 (89.9)     | 135 (90.6)         | 0.862   |
| <b>Dysglycaemia</b><br>Fasting glucose≥5.6mmol/l<br>or/and 2-hour glucose≥8.5mmol/l | 137<br>(62.3)       | 55.6-68.5              | 62 (88.6)     | 75 (50.0)          | <0.001* |
| <b>Any dyslipidaemia</b>                                                            | 164<br>(74.6)       | 68.3-79.9              | 52 (74.3)     | 112 (75.2)         | 0.759   |
| Triglycerides ≥1.7mmol/l                                                            | 17 (7.7)            | 4.8-12.1               | 9 (12.7)      | 8 (5.4)            | 0.058   |
| Total cholesterol ≥5.2mmol/l                                                        | 21 (10.9)           | 20.9-32.6              | 10 (17.5)     | 11 (8.1)           | 0.054   |
| HDL<1.3mmol/l                                                                       | 139<br>(63.2)       | 56.6-69.3              | 41 (58.5)     | 98 (65.3)          | 0.249   |
| <b>BP≥130/85mmHg</b>                                                                | 91 (41.4)           | 35.0-48.0              | 30 (42.9)     | 61 (40.7)          | 0.565   |
| <b>Insulin resistance</b><br>HOMA-IR >1.95, N = 108                                 | 81 (75.0)           | 65.9-82.3              | 9(90.0)       | 72 (73.5)          | 0.250   |
