# Supplementary material for: High prevalence of cardiovascular risk factors and insulin resistance 6 years after hyperglycemia first detected in pregnancy in Cape Town, South Africa
Source: PubMed Central journal article supplement — BMJ Open Diabetes Res Care. 2019 Nov 27;7(1):e000740. doi: 10.1136/bmjdrc-2019-000740 (PMC6887495; doi:10.1136/bmjdrc-2019-000740), 2019-11-27
Supplement: bmjdrc-2019-000740supp003.pdf [file bmjdrc-2019-000740supp003.pdf]

Supplemental Table 2. Anthropometry and biochemical characteristics at follow-up

|                                   |              | Overall, n = 220 |
|-----------------------------------|--------------|------------------|
| Waist circumference (cm)          | Mean (SD)    | 110.5 (17.6)     |
| Hip circumference (cm)            | Mean (SD)    | 117.3 (16.1)     |
| Waist-hip ratio                   | median (IQR) | 0.94 (0.89-0.99) |
| Waist-height ratio                | median (IQR) | 0.68 (0.61-0.75) |
| BMI (kg/m <sup>2</sup> )          | Mean (SD)    | 34.9 (8.7)       |
| Systolic blood pressure (mmHg)    | Mean (SD)    | 114 (14.6)       |
| Diastolic blood pressure (mmHg)   | Mean (SD))   | 79.7 (10.6)      |
| Fasting blood glucose (mmol/l)    | Median (IQR) | 5.8 (5.0-8.1)    |
| OGTT 2-hour glucose (mmol/l)      | Median (IQR) | 8.0 (6.2-11.7)   |
| HbA1c (% , DCCT units)            | Median (IQR) | 6.0 (5.3-7.8)    |
| Total cholesterol (mmol/l)        | Median (IQR) | 3.8 (3.2-4.5)    |
| HDL-cholesterol (mmol/l)          | Median (IQR) | 1.2 (1.0-1.4)    |
| LDL-cholesterol (mmol/l)          | Median (IQR) | 2.9 (2.3-3.6)    |
| Triglycerides (mmol/l)            | Median (IQR) | 0.76 (0.55-1.06) |
| Fasting insulin (uIU/mL), N = 108 | Median (IQR) | 13.4 (9.3-20)    |
| HOMA-IR, N = 108                  | Median (IQR) | 3.0 (1.9 – 5.1)  |
