# Supplementary material for: High prevalence of cardiovascular risk factors and insulin resistance 6 years after hyperglycemia first detected in pregnancy in Cape Town, South Africa
Source: PubMed Central journal article supplement — BMJ Open Diabetes Res Care. 2019 Nov 27;7(1):e000740. doi: 10.1136/bmjdrc-2019-000740 (PMC6887495; doi:10.1136/bmjdrc-2019-000740), 2019-11-27
Supplement: bmjdrc-2019-000740supp004.pdf [file bmjdrc-2019-000740supp004.pdf]

Supplemental Table 4a. Multivariate analysis of factors associated with raised blood pressure and dyslipidaemia

|                                          | Raised Blood pressure |         |                                  |           |           | Dyslipidaemia |         |                                  |           |           |
|------------------------------------------|-----------------------|---------|----------------------------------|-----------|-----------|---------------|---------|----------------------------------|-----------|-----------|
|                                          | OR                    | p-value | Bonfer                           | 95% CI    |           | OR            | p-value | Bonfer                           | 95% CI    |           |
|                                          |                       |         | roni<br>adjuste<br>d p-<br>value | low<br>er | upp<br>er |               |         | roni<br>adjuste<br>d p-<br>value | low<br>er | upp<br>er |
| Age at follow-up (years)                 | 1.1                   | 0.079   | 0.316                            | 1.0       | 1.2       | 1.0           | 0.635   | 1                                | 0.9       | 1.1       |
| Follow-up period (years)                 | 0.9                   | 0.02    | 0.008                            | 0.9       | 1.0       | 1.0           | 0.688   | 1                                | 1.0       | 1.1       |
| Ethnicity - mixed ancestry (vs black)    | 0.6                   | 0.127   | 0.508                            | 0.3       | 1.2       | 1.2           | 0.74    | 1                                | 0.5       | 2.7       |
| Others (vs black)                        | 0.5                   | 0.358   | 1                                | 0.1       | 2.3       | 0.6           | 0.525   | 1                                | 0.1       | 3.2       |
| Education - primary (vs tertiary)        | 0.8                   | 0.716   | 1                                | 0.2       | 3.3       | 4.2           | 0.07    | 0.28                             | 0.9       | 19.4      |
| Secondary & matric (vs tertiary)         | 1.7                   | 0.336   | 1                                | 0.6       | 4.9       | 2.2           | 0.111   | 0.444                            | 0.8       | 5.7       |
| Employed (vs unemployed)                 | 0.3                   | 0.02    | 0.008                            | 0.2       | 0.7       | 0.8           | 0.568   | 1                                | 0.4       | 1.7       |
| Family history of hypertension           | 2.2                   | 0.043   | 0.172                            | 1.0       | 4.8       | 2.0           | 0.084   | 0.336                            | 0.9       | 4.3       |
| Subsequent pregnancy (vs none)           | 0.8                   | 0.516   | 1                                | 0.4       | 1.7       | 0.7           | 0.367   | 1                                | 0.3       | 1.6       |
| Average length of breastfeeding (months) | 1.0                   | 0.539   | 1                                | 1.0       | 1.0       | 1.0           | 0.322   | 1                                | 1.0       | 1.1       |
| Current smoker (vs current non-smoker)   | 1.0                   | 0.972   | 1                                | 0.5       | 2.3       | 1.7           | 0.305   | 1                                | 0.6       | 4.3       |
| Waist circumference (cm)                 | 1.1                   | 0.09    | 0.036                            | 1.0       | 1.1       | 1.1           | 0.08    | 0.032                            | 1.0       | 1.1       |
| Hip circumference (cm)                   | 1.0                   | 0.449   | 1                                | 1.0       | 1.0       | 0.9           | 0.08    | 0.032                            | 0.9       | 1.0       |
| Weight gain (kg)                         | 1.0                   | 0.701   | 1                                | 1.0       | 1.0       | 1.0           | 0.497   | 1                                | 1.0       | 1.1       |
| Overweight at booking                    | 0.7                   | 0.532   | 1                                | 0.2       | 2.4       | 2.1           | 0.241   | 0.964                            | 0.6       | 7.1       |
| Obese at booking                         | 0.8                   | 0.69    | 1                                | 0.2       | 2.9       | 6.4           | 0.013   | 0.052                            | 1.5       | 27.9      |
| Morbid obese at booking                  | 1.0                   | 0.965   | 1                                | 0.2       | 6.1       | 8.3           | 0.045   | 0.18                             | 1.0       | 65.5      |
| Fasting glucose at HFDP diagnosis        | 0.9                   | 0.617   | 1                                | 0.7       | 1.2       | 1.0           | 0.811   | 1                                | 0.8       | 1.3       |

|                                       |                |       |        |                |     |       |       |       |     |       |
|---------------------------------------|----------------|-------|--------|----------------|-----|-------|-------|-------|-----|-------|
| OGTT 2-hour glucose at HFDP diagnosis | 1.1            | 0.451 | 1      | 0.9            | 1.3 | 0.9   | 0.187 | 0.748 | 0.7 | 1.1   |
| Insulin treatment during HFDP         | 1.0            | 0.984 | 1      | 0.4            | 2.7 | 0.5   | 0.14  | 0.56  | 0.2 | 1.3   |
| GPAQ total physical activity          | 1.0            | 0.774 | 1      | 1.0            | 1.0 | 1.0   | 0.804 | 1     | 1.0 | 1.0   |
| _cons                                 | 0              | 0.038 | 0.152  | 0.0            | 0.7 | 1.1   | 0.986 | 1     | 0.0 | 286.8 |
| Model statistics                      | Number of obs  |       | 211.0  | Number of obs  |     | 211.0 |       |       |     |       |
|                                       | LR chi2(21)    |       | 55.6   | LR chi2(21)    |     | 45.3  |       |       |     |       |
|                                       | Prob > chi2    |       | 0.000  | Prob > chi2    |     | 0.002 |       |       |     |       |
|                                       | Pseudo R2      |       | 0.2    | Pseudo R2      |     | 0.2   |       |       |     |       |
|                                       | Log likelihood |       | -115.6 | Log likelihood |     | -97.4 |       |       |     |       |

**NB:** For the Bonferroni adjustment – for each outcome, the p-value was multiplied by the number of tests (4 outcomes – 4 tests). Significance was set at  $p = 0.05$
