# Supplementary material for: High prevalence of cardiovascular risk factors and insulin resistance 6 years after hyperglycemia first detected in pregnancy in Cape Town, South Africa
Source: PubMed Central journal article supplement — BMJ Open Diabetes Res Care. 2019 Nov 27;7(1):e000740. doi: 10.1136/bmjdrc-2019-000740 (PMC6887495; doi:10.1136/bmjdrc-2019-000740), 2019-11-27
Supplement: bmjdrc-2019-000740supp005.pdf [file bmjdrc-2019-000740supp005.pdf]

**Supplemental Table 4b. Multivariate analysis of factors associated with dysglycaemia and insulin resistance**

|                                          | Dysglycaemia |         |                             |        |       | Insulin Resistance |         |                             |        |       |
|------------------------------------------|--------------|---------|-----------------------------|--------|-------|--------------------|---------|-----------------------------|--------|-------|
|                                          | OR           | p-value | Bonferroni adjusted p-value | 95% CI |       | OR                 | p-value | Bonferroni adjusted p-value | 95% CI |       |
|                                          |              |         |                             | lower  | upper |                    |         |                             | lower  | upper |
| Age at follow-up (years)                 | 1.0          | 0.443   | 1                           | 1.0    | 1.1   | 1.1                | 0.533   | 1                           | 0.9    | 1.2   |
| Follow-up period (years)                 | 1.0          | 0.244   | 0.976                       | 0.9    | 1.0   | 1.0                | 0.516   | 1                           | 0.9    | 1.1   |
| Ethnicity - mixed ancestry (vs black)    | 1.9          | 0.159   | 0.636                       | 0.8    | 4.4   | 4.5                | 0.051   | 0.204                       | 1.0    | 20.3  |
| Others (vs black)                        | 0.3          | 0.182   | 0.728                       | 0.1    | 1.8   | 1.3                | 0.817   | 1                           | 0.1    | 12.6  |
| Education - primary (vs tertiary)        | 1.2          | 0.825   | 1                           | 0.2    | 6.1   | 0.2                | 0.409   | 1                           | 0.0    | 8.6   |
| Secondary & matric (vs tertiary)         | 1.1          | 0.892   | 1                           | 0.4    | 3.0   | 0.5                | 0.394   | 1                           | 0.1    | 2.3   |
| Employed (vs unemployed)                 | 0.9          | 0.781   | 1                           | 0.4    | 1.9   | 1.4                | 0.61    | 1                           | 0.4    | 5.1   |
| Family history of hypertension           | 1.0          | 0.974   | 1                           | 0.4    | 2.2   | 1.0                | 0.964   | 1                           | 0.3    | 3.6   |
| Subsequent pregnancy (vs none)           | 0.5          | 0.125   | 0.5                         | 0.2    | 1.2   | 0.2                | 0.021   | 0.084                       | 0.0    | 0.8   |
| Average length of breastfeeding (months) | 1.0          | 0.704   | 1                           | 1.0    | 1.0   | 1.0                | 0.375   | 1                           | 1.0    | 1.1   |
| Current smoker (vs current non-smoker)   | 0.8          | 0.518   | 1                           | 0.3    | 1.8   | 2.1                | 0.363   | 1                           | 0.4    | 9.8   |
| Waist circumference (cm)                 | 1.1          | 0       | 0                           | 1.0    | 1.1   | 1.1                | 0.078   | 0.312                       | 1.0    | 1.1   |
| Hip circumference (cm)                   | 0.9          | 0.011   | 0.044                       | 0.9    | 1.0   | 0.9                | 0.158   | 0.632                       | 0.9    | 1.0   |
| Weight gain (kg)                         | 1.0          | 0.191   | 0.764                       | 1.0    | 1.1   | 1.1                | 0.138   | 0.552                       | 1.0    | 1.1   |
| Overweight at booking                    | 0.5          | 0.286   | 1                           | 0.1    | 1.9   | 3.5                | 0.167   | 0.668                       | 0.6    | 21.2  |
| Obese at booking                         | 1.0          | 0.973   | 1                           | 0.3    | 4.3   | 6.7                | 0.08    | 0.32                        | 0.8    | 55.4  |
| Morbid obese at booking                  | 1.1          | 0.924   | 1                           | 0.1    | 8.6   | 10.4               | 0.127   | 0.508                       | 0.5    | 211.8 |

|                                       |                |       |       |     |                |     |         |       |     |      |
|---------------------------------------|----------------|-------|-------|-----|----------------|-----|---------|-------|-----|------|
| Fasting glucose at HFDP diagnosis     | 1.6            | 0.018 | 0.072 | 1.1 | 2.4            | 2.3 | 0.051   | 0.204 | 1.0 | 5.2  |
| OGTT 2-hour glucose at HFDP diagnosis | 1.4            | 0.013 | 0.052 | 1.1 | 1.7            | 1.0 | 0.889   | 1     | 0.6 | 1.7  |
| Insulin treatment during HFDP         | 5.9            | 0.013 | 0.052 | 1.4 | 23.9           | 1.0 | omitted |       |     |      |
| GPAQ total physical activity          | 1.0            | 0.594 | 1     | 1.0 | 1.0            | 1.0 | 0.456   | 1     | 1.0 | 1.0  |
| _cons                                 | 0.0            | 0.012 | 0.048 | 0.0 | 0.2            | 0.0 | 0.233   | 0.932 | 0.0 | 77.9 |
| Model statistics                      | Number of obs  |       | 211.0 |     | Number of obs  |     | 98.0    |       |     |      |
|                                       | LR chi2(21)    |       | 85.3  |     | LR chi2(20)    |     | 29.5    |       |     |      |
|                                       | Prob > chi2    |       | 0.000 |     | Prob > chi2    |     | 0.078   |       |     |      |
|                                       | Pseudo R2      |       | 0.3   |     | Pseudo R2      |     | 0.3     |       |     |      |
|                                       | Log likelihood |       | -97.4 |     | Log likelihood |     | -42.9   |       |     |      |

NB: For the Bonferroni adjustment – for each outcome, the p-value was multiplied by the number of tests (4 outcomes – 4 tests). Significance was set at  $p = 0.05$
